# Supplementary material
Source: HighWire-hosted journal article supplement (https://jnm.snmjournals.org/highwire/filestream/100091/field_highwire_adjunct_files/0/248260_Supplemental_Data.pdf)
Supplement: 248260_Supplemental_Data.pdf [file 248260_Supplemental_Data.pdf]

|                                                         | Plane   | Slice thickness (mm) | Repetition time/ Echo time (ms)                           | Flip angle (°) | Field of view (mm) | Phase FoV (%) | Matrix size |
|---------------------------------------------------------|---------|----------------------|-----------------------------------------------------------|----------------|--------------------|---------------|-------------|
| <b>T1w VIBE Dixon</b>                                   | coronal | 3.12                 | 3.6 / 1.23 (1 <sup>st</sup> ) and 2.46 (2 <sup>nd</sup> ) | 10             | 500                | 65.6          | 192 x 79    |
| <b>STIR</b>                                             | coronal | 5                    | 5990 / 57<br>Inversion time: 220ms                        | 135            | 380                | 75.0          | 384 x 288   |
| <b>T1w TSE</b>                                          | axial   | 5                    | 616 / 12                                                  | 150            | 380                | 68.8          | 512 x 256   |
| <b>T2w TSE</b>                                          | axial   | 5                    | 4860 / 106                                                | 150            | 380                | 68.8          | 512 x 256   |
| <b>DW EPI (b-values: 0, 500, 1000 s/mm<sup>2</sup>)</b> | axial   | 5                    | 7400 / 72                                                 | 9              | 420                | 75.0          | 160 x 120   |
| <b>T1w VIBE dynamic imaging fat saturated</b>           | axial   | 3.5                  | 4.32 / 2.21                                               | 9              | 380                | 68.8          | 512 x 308   |
| <b>T1w TSE post contrast fat saturated</b>              | coronal | 5                    | 542 / 13                                                  | 160            | 380                | 75            | 512 x 256   |
| <b>T1w TSE post contrast fat saturated</b>              | axial   | 5                    | 663 / 13                                                  | 160            | 380                | 68.8          | 512 x 256   |

SUPPLEMENT TABLE 1: Illustration of the sequence parameters of the MR imaging protocol.

| <b>Patient</b> | <b>Histological subtypes</b>          | <b>Vital tumor (%)</b> | <b>Necrosis (%)</b> | <b>Fibrosis/Sclerosis (%)</b> | <b>Hemorrhage</b> |
|----------------|---------------------------------------|------------------------|---------------------|-------------------------------|-------------------|
| 1              | Undifferentiated pleomorphic sarcoma  | 5                      | 60                  | 35                            | +                 |
| 2              | Undifferentiated pleomorphic sarcoma  | <1                     | 70                  | <30                           | -                 |
| 3              | Undifferentiated pleomorphic sarcoma  | <10                    | 60                  | >30                           | +                 |
| 4              | Liposarcoma                           | 90                     | 10                  | 0                             | -                 |
| 5              | Liposarcoma                           | 20                     | 30                  | 50                            | -                 |
| 6              | Undifferentiated spindle cell sarcoma | <1                     | 70                  | <30                           | -                 |
| 7              | Undifferentiated pleomorphic sarcoma  | 5                      | 95                  | 0                             | -                 |
| 8              | Undifferentiated pleomorphic sarcoma  | 40                     | 50                  | 10                            | +                 |
| 9              | Liposarcoma                           | 80                     | 20                  | 0                             | -                 |
| 10             | Synovial sarcoma                      | 5                      | 90                  | 5                             | -                 |
| 11             | Leiomyosarcoma                        | 5                      | 70                  | 25                            | -                 |
| 12             | Myxofibrosarcoma                      | <10                    | 70                  | >20                           | -                 |
| 13             | Synovial sarcoma                      | 90                     | 0                   | 10                            | +                 |
| 14             | Undifferentiated spindle cell sarcoma | 40                     | 40                  | 20                            | -                 |
| 15             | Undifferentiated spindle cell sarcoma | 0                      | 70                  | 30                            | -                 |
| 16             | Synovial sarcoma                      | <1                     | 30                  | <70                           | -                 |
| 17             | Undifferentiated pleomorphic sarcoma  | <1                     | >90                 | <10                           | -                 |
| 18             | Synovial sarcoma                      | 5                      | 90                  | 5                             | -                 |
| 19             | Myxofibrosarcoma                      | <10                    | 60                  | >30                           | +                 |
| 20             | Synovial sarcoma                      | <1                     | 60                  | <40                           | -                 |
| 21             | Synovial sarcoma                      | 40                     | 40                  | 20                            | +                 |

|           |                                         |     |    |     |   |
|-----------|-----------------------------------------|-----|----|-----|---|
| <b>22</b> | Myxofibrosarcoma                        | <10 | 80 | >10 | - |
| <b>23</b> | Liposarcoma                             | 50  | 40 | 10  | - |
| <b>24</b> | Myxofibrosarcoma                        | 80  | 10 | 10  | - |
| <b>25</b> | Undifferentiated pleomorphic sarcoma    | 0   | 70 | 30  | - |
| <b>26</b> | Synovial sarcoma                        | 40  | 30 | 30  | - |
| <b>27</b> | Myxofibrosarcoma                        | 100 | 0  | 0   | - |
| <b>28</b> | Liposarcoma                             | <5  | 0  | >95 | - |
| <b>29</b> | Synovial sarcoma                        | 0   | 60 | 40  | + |
| <b>30</b> | Leiomyosarcoma                          | 5   | 80 | 15  | + |
| <b>31</b> | Epitheloid sarcoma                      | 5   | 90 | 5   | - |
| <b>32</b> | Undifferentiated pleomorphic sarcoma    | 0   | 0  | 100 | - |
| <b>33</b> | Synovial sarcoma                        | 50  | 40 | 10  | - |
| <b>34</b> | Myxofibrosarcoma                        | 90  | 0  | 10  | - |
| <b>35</b> | Malignant peripheral nerve sheath tumor | <30 | 60 | >10 | - |
| <b>36</b> | Undifferentiated pleomorphic sarcoma    | 0   | 0  | 100 | + |
| <b>37</b> | Liposarcoma                             | 95  | 0  | 5   | - |

SUPPLEMENT TABLE 2: Illustration of the histological subtypes for all patients and histological results after tumor resection.
